# Supplementary material for: Solketal Removal from Aqueous Solutions Using Activated Carbon and a Metal–Organic Framework as Adsorbents
Source: MDPI journal article supplement (doi:10.3390/ma14226852), 2021-11-13
Supplement: s1 [file s1]

Supplementary Information

# Solketal Removal from Aqueous Solutions Using Activated Carbon and a Metal–Organic Framework as Adsorbents

Leticia Santamaría, Sophia A. Korili and Antonio Gil \*

INAMAT<sup>2</sup>, Departamento de Ciencias, Universidad Pública de Navarra, Campus de Arrosadía, 31006 Pamplona, Spain; leticia.santamaria@unavarra.es (L.S.); sofia.korili@unavarra.es (S.A.K.)

\* Correspondence: andoni@unavarra.es; Tel.: +34-948-169-602

**Table S1.** Pseudo-first and pseudo-second-order parameters for the adsorption of organic molecules by the activated carbon.

| Sample     |               | Pseudo-First Order    |                       |                       |                       |                       | Pseudo-Second Order   |                       |                       |                       |                       |                       |
|------------|---------------|-----------------------|-----------------------|-----------------------|-----------------------|-----------------------|-----------------------|-----------------------|-----------------------|-----------------------|-----------------------|-----------------------|
|            |               | 10 mg/dm <sup>3</sup> | 15 mg/dm <sup>3</sup> | 20 mg/dm <sup>3</sup> | 15 mg/dm <sup>3</sup> | 15 mg/dm <sup>3</sup> | 10 mg/dm <sup>3</sup> | 15 mg/dm <sup>3</sup> | 20 mg/dm <sup>3</sup> | 15 mg/dm <sup>3</sup> | 15 mg/dm <sup>3</sup> |                       |
|            |               | 20 mg                 | 20 mg                 | 20 mg                 | 10 mg                 | 30 mg                 | 20 mg                 | 20 mg                 | 20 mg                 | 10 mg                 | 30 mg                 |                       |
| Diclofenac | $k_1$ (1/min) | 0.041                 | 0.036                 | 0.051                 | 0.034                 | 0.042                 | $k_2$ (1/min)         | $8.73 \times 10^{-4}$ | $6.48 \times 10^{-4}$ | $8.45 \times 10^{-4}$ | $5.43 \times 10^{-4}$ | $8.29 \times 10^{-4}$ |
|            | $\chi^2$      | 1836                  | 2044                  | 3388                  | 1372                  | 2436                  | $\chi^2$              | 439                   | 823                   | 815                   | 1128                  | 520                   |
|            | R             | 0.95                  | 0.96                  | 0.93                  | 0.93                  | 0.93                  | R                     | 0.99                  | 0.99                  | 0.98                  | 0.98                  | 0.99                  |
| Caffeine   | $k_1$ (1/min) | 0.098                 | 0.108                 | 0.117                 | 0.072                 | 0.079                 | $k_2$ (1/min)         | $2.68 \times 10^{-3}$ | $2.10 \times 10^{-3}$ | $2.12 \times 10^{-3}$ | 9.61E-4               | $1.69 \times 10^{-3}$ |
|            | $\chi^2$      | 319                   | 943                   | 1646                  | 1096                  | 1470                  | $\chi^2$              | 216                   | 101                   | 199                   | 533                   | 240                   |
|            | R             | 0.98                  | 0.97                  | 0.95                  | 0.99                  | 0.94                  | R                     | 0.99                  | 0.997                 | 0.995                 | 0.994                 | 0.991                 |
|            |               | 50 g/dm <sup>3</sup>  | 75 g/dm <sup>3</sup>  | 100 g/dm <sup>3</sup> | 75 g/dm <sup>3</sup>  | 75 g/dm <sup>3</sup>  |                       |                       |                       |                       |                       |                       |
|            |               | 1.5 g                 | 1.5 g                 | 1.5 g                 | 1 g                   | 2 g                   | 1.5 g                 | 1.5 g                 | 1.5 g                 | 1 g                   | 2 g                   |                       |
| Solketal   | $k_1$ (1/min) | 0.072                 | 0.089                 | 0.092                 | 0.060                 | 0.12                  | $k_2$ (1/min)         | 0.027                 | 0.027                 | 0.024                 | 0.014                 | 0.054                 |
|            | $\chi^2$      | 4                     | 3.7                   | 5.8                   | 6                     | 1.75                  | $\chi^2$              | 0.52                  | 0.40                  | 0.87                  | 0.97                  | 0.18                  |
|            | R             | 0.95                  | 0.97                  | 0.97                  | 0.97                  | 0.96                  | R                     | 0.993                 | 0.997                 | 0.995                 | 0.996                 | 0.996                 |

**Table S2.** Pseudo-first and pseudo-second-order parameters for the adsorption of organic molecules by the metal organic framework.

| Sample     |               | Pseudo-First Order    |                       |                       |                       |                       | Pseudo-Second Order   |                       |                       |                       |                       |                      |                      |
|------------|---------------|-----------------------|-----------------------|-----------------------|-----------------------|-----------------------|-----------------------|-----------------------|-----------------------|-----------------------|-----------------------|----------------------|----------------------|
|            |               | 10 mg/dm <sup>3</sup> | 15 mg/dm <sup>3</sup> | 20 mg/dm <sup>3</sup> | 15 mg/dm <sup>3</sup> | 15 mg/dm <sup>3</sup> | 10 mg/dm <sup>3</sup> | 15 mg/dm <sup>3</sup> | 20 mg/dm <sup>3</sup> | 15 mg/dm <sup>3</sup> | 15 mg/dm <sup>3</sup> |                      |                      |
|            |               | 75 mg                 | 75 mg                 | 75 mg                 | 50 mg                 | 100 mg                | 75 mg                 | 75 mg                 | 75 mg                 | 50 mg                 | 100 mg                |                      |                      |
| Diclofenac | $k_1$ (1/min) | 0.044                 | 0.245                 | 0.178                 | 0.011                 | 0.041                 | $k_2$ (1/min)         | 0.040                 | 0.014                 | $6.94 \times 10^{-3}$ | $3.80 \times 10^{-3}$ | 0.032                |                      |
|            | $\chi^2$      | 14                    | 130                   | 263                   | 593                   | 40.4                  | $\chi^2$              | 10.2                  | 9.3                   | 25                    | 125                   | 3.82                 |                      |
|            | R             | 0.991                 | 0.97                  | 0.97                  | 0.94                  | 0.98                  | R                     | 0.993                 | 0.996                 | 0.997                 | 0.99                  | 0.998                |                      |
| Caffeine   | $k_1$ (1/min) | 0.14                  | 0.100                 | 0.081                 | 0.082                 | 0.14                  | $k_2$ (1/min)         | 0.016                 | $6.92 \times 10^{-3}$ | $4.31 \times 10^{-3}$ | $4.96 \times 10^{-3}$ | 0.011                |                      |
|            | $\chi^2$      | 46                    | 254                   | 177                   | 220                   | 140                   | $\chi^2$              | 7.7                   | 76                    | 27.9                  | 54                    | 34                   |                      |
|            | R             | 0.95                  | 0.87                  | 0.96                  | 0.93                  | 0.90                  | R                     | 0.991                 | 0.96                  | 0.994                 | 0.98                  | 0.98                 |                      |
|            |               | 50 g/dm <sup>3</sup>  | 75 g/dm <sup>3</sup>  | 100 g/dm <sup>3</sup> | 75 g/dm <sup>3</sup>  | 75 g/dm <sup>3</sup>  |                       |                       | 50 g/dm <sup>3</sup>  | 75 g/dm <sup>3</sup>  | 100 g/dm <sup>3</sup> | 75 g/dm <sup>3</sup> | 75 g/dm <sup>3</sup> |
|            |               | 1.5 g                 | 1.5 g                 | 1.5 g                 | 1 g                   | 2 g                   |                       |                       | 1.5 g                 | 1.5 g                 | 1.5 g                 | 1 g                  | 2 g                  |
| Solketal   | $k_1$ (1/min) | 0.56                  | 0.51                  | 0.41                  | 0.29                  | 0.48                  | $k_2$ (1/min)         | 0.56                  | 0.36                  | 0.234                 | 0.18                  | 0.39                 |                      |
|            | $\chi^2$      | 0.07                  | 0.20                  | 0.44                  | 0.43                  | 0.42                  | $\chi^2$              | 0.032                 | 0.27                  | 0.30                  | 0.29                  | 0.09                 |                      |
|            | R             | 0.991                 | 0.991                 | 0.99                  | 0.99                  | 0.98                  | R                     | 0.996                 | 0.99                  | 0.992                 | 0.99                  | 0.994                |                      |

**Table S3.** Intraparticle rate parameters for the adsorption of organic molecules by the AC and MOF.

| Sample     |                                    | Active Carbon         |                       |                       |                       |                       | MOF                   |                       |                       |                       |                       |
|------------|------------------------------------|-----------------------|-----------------------|-----------------------|-----------------------|-----------------------|-----------------------|-----------------------|-----------------------|-----------------------|-----------------------|
|            |                                    | 10 mg/dm <sup>3</sup> | 15 mg/dm <sup>3</sup> | 20 mg/dm <sup>3</sup> | 15 mg/dm <sup>3</sup> | 15 mg/dm <sup>3</sup> | 10 mg/dm <sup>3</sup> | 15 mg/dm <sup>3</sup> | 20 mg/dm <sup>3</sup> | 15 mg/dm <sup>3</sup> | 15 mg/dm <sup>3</sup> |
|            |                                    | 20 mg                 | 20 mg                 | 20 mg                 | 10 mg                 | 30 mg                 | 75 mg                 | 75 mg                 | 75 mg                 | 50 mg                 | 100 mg                |
| Diclofenac | $K_3'$ (mg/g·min <sup>0.5</sup> )  | 8.54                  | 9.18                  | 10.31                 | 10.27                 | 8.71                  | 5.03                  | 7.00                  | 9.14                  | 8.32                  | 5.64                  |
|            | R                                  | 0.99                  | 0.99                  | 0.97                  | 0.99                  | 0.99                  | 0.80                  | 0.94                  | 0.96                  | 0.97                  | 0.89                  |
|            | $K_3''$ (mg/g·min <sup>0.5</sup> ) | 1.99                  | 1.64                  | 2.00                  | 2.94                  | 2.02                  | 0.01                  | 0.12                  | 0.27                  | 0.71                  | 0.03                  |
|            | R                                  | 0.92                  | 0.97                  | 0.95                  | 0.98                  | 0.98                  | 0.55                  | 0.77                  | 0.77                  | 0.91                  | 0.74                  |
| Caffeine   | $K_3'$ (mg/g·min <sup>0.5</sup> )  | 9.40                  | 11.76                 | 11.64                 | 17.14                 | 8.92                  | 2.64                  | 3.35                  | 4.93                  | 3.95                  | 3.30                  |
|            | R                                  | 0.99                  | 0.96                  | 0.94                  | 0.98                  | 0.95                  | 0.97                  | 0.93                  | 0.99                  | 0.97                  | 0.91                  |
|            | $K_3''$ (mg/g·min <sup>0.5</sup> ) | 0.12                  | 0.51                  | 0.77                  | 0.77                  | 1.13                  | 0.19                  | 0.51                  | 0.52                  | 0.52                  | 0.35                  |
|            | R                                  | 0.63                  | 0.93                  | 0.91                  | 0.76                  | 0.95                  | 0.86                  | 0.95                  | 0.90                  | 0.90                  | 0.93                  |
|            |                                    | 50 g/dm <sup>3</sup>  | 75 g/dm <sup>3</sup>  | 100 g/dm <sup>3</sup> | 75 g/dm <sup>3</sup>  | 75 g/dm <sup>3</sup>  | 50 g/dm <sup>3</sup>  | 75 g/dm <sup>3</sup>  | 100 g/dm <sup>3</sup> | 75 g/dm <sup>3</sup>  | 75 g/dm <sup>3</sup>  |
|            |                                    | 1.5 g                 | 1.5 g                 | 1.5 g                 | 1 g                   | 2 g                   | 1.5 g                 | 1.5 g                 | 1.5 g                 | 1 g                   | 2 g                   |
| Solketal   | $K_3'$ (mg/g·min <sup>0.5</sup> )  | 0.41                  | 0.71                  | 0.80                  | 0.84                  | 0.50                  | 0.49                  | 0.72                  | 0.86                  | 0.83                  | 0.64                  |
|            | R                                  | 0.97                  | 0.97                  | 0.96                  | 0.98                  | 0.97                  | 0.90                  | 0.92                  | 0.92                  | 0.97                  | 0.92                  |
|            | $K_3''$ (mg/g·min <sup>0.5</sup> ) | 0.093                 | 0.064                 | 0.067                 | 0.10                  | 0.055                 | 5E-4                  | 0.002                 | 0.001                 | 0.002                 | 0.002                 |
|            | R                                  | 0.97                  | 0.97                  | 0.91                  | 0.94                  | 0.95                  | 0.10                  | 0.61                  | 0.19                  | 0.72                  | 0.68                  |

**Table S4.** Effective diffusion coefficients for the adsorption of organic molecules by the AC and MOF.

| Sample     |               | Active Carbon         |                       |                       |                       |                       | MOF                   |                       |                       |                       |                       |
|------------|---------------|-----------------------|-----------------------|-----------------------|-----------------------|-----------------------|-----------------------|-----------------------|-----------------------|-----------------------|-----------------------|
|            |               | 10 mg/dm <sup>3</sup> | 15 mg/dm <sup>3</sup> | 20 mg/dm <sup>3</sup> | 15 mg/dm <sup>3</sup> | 15 mg/dm <sup>3</sup> | 10 mg/dm <sup>3</sup> | 15 mg/dm <sup>3</sup> | 20 mg/dm <sup>3</sup> | 15 mg/dm <sup>3</sup> | 15 mg/dm <sup>3</sup> |
|            |               | 20 mg                 | 20 mg                 | 20 mg                 | 10 mg                 | 30 mg                 | 75 mg                 | 75 mg                 | 75 mg                 | 50 mg                 | 100 mg                |
| Diclofenac | $D/r^2$ (1/s) | $2.66 \times 10^{-5}$ | $2.41 \times 10^{-5}$ | $3.26 \times 10^{-5}$ | $2.21 \times 10^{-5}$ | $2.56 \times 10^{-5}$ | $4.03 \times 10^{-4}$ | $2.08 \times 10^{-4}$ | $1.45 \times 10^{-4}$ | $7.85 \times 10^{-5}$ | $3.78 \times 10^{-4}$ |
|            | $\chi^2$      | 0.031                 | 0.020                 | 0.050                 | 0.038                 | 0.064                 | 0.0069                | 0.017                 | 0.017                 | 0.055                 | 0.0096                |
|            | R             | 0.994                 | 0.997                 | 0.99                  | 0.993                 | 0.99                  | 0.998                 | 0.994                 | 0.995                 | 0.99                  | 0.996                 |
| Caffeine   | $D/r^2$ (1/s) | $7.61 \times 10^{-5}$ | $8.05 \times 10^{-5}$ | $8.55 \times 10^{-5}$ | $5.19 \times 10^{-5}$ | $5.21 \times 10^{-5}$ | $1.02 \times 10^{-4}$ | $5.97 \times 10^{-5}$ | $5.66 \times 10^{-5}$ | $5.38 \times 10^{-5}$ | $9.66 \times 10^{-5}$ |
|            | $\chi^2$      | 0.008                 | 0.015                 | 0.042                 | 0.014                 | 0.066                 | 0.052                 | 0.17                  | 0.024                 | 0.058                 | 0.15                  |
|            | R             | 0.998                 | 0.996                 | 0.99                  | 0.997                 | 0.98                  | 0.985                 | 0.95                  | 0.994                 | 0.99                  | 0.95                  |
|            |               | 50 g/dm <sup>3</sup>  | 75 g/dm <sup>3</sup>  | 100 g/dm <sup>3</sup> | 75 g/dm <sup>3</sup>  | 75 g/dm <sup>3</sup>  | 50 g/dm <sup>3</sup>  | 75 g/dm <sup>3</sup>  | 100 g/dm <sup>3</sup> | 75 g/dm <sup>3</sup>  | 75 g/dm <sup>3</sup>  |
|            |               | 1.5 g                 | 1.5 g                 | 1.5 g                 | 1 g                   | 2 g                   | 1.5 g                 | 1.5 g                 | 1.5 g                 | 1 g                   | 2 g                   |
| Solketal   | $D/r^2$ (1/s) | $4.73 \times 10^{-5}$ | $6.35 \times 10^{-5}$ | $6.45 \times 10^{-5}$ | $4.15 \times 10^{-5}$ | $8.9 \times 10^{-5}$  | $4.95 \times 10^{-4}$ | $4.61 \times 10^{-4}$ | $3.72 \times 10^{-4}$ | $2.56 \times 10^{-4}$ | $3.88 \times 10^{-4}$ |
|            | $\chi^2$      | 0.049                 | 0.015                 | 0.028                 | 0.013                 | 0.045                 | 0.0057                | 0.014                 | 0.012                 | 0.0092                | 0.012                 |
|            | R             | 0.99                  | 0.996                 | 0.993                 | 0.998                 | 0.99                  | 0.997                 | 0.993                 | 0.995                 | 0.996                 | 0.996                 |

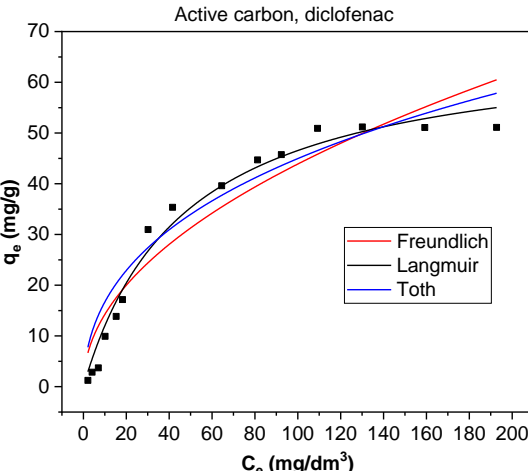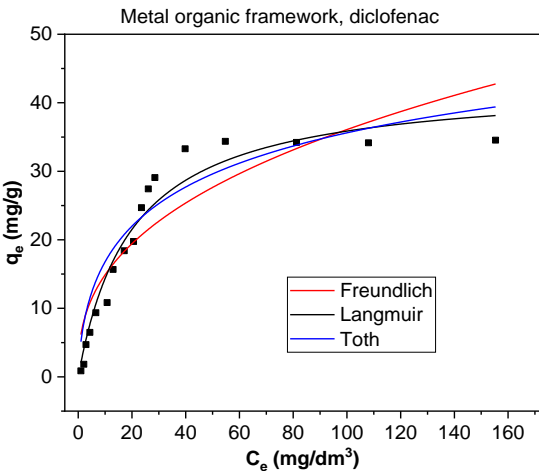

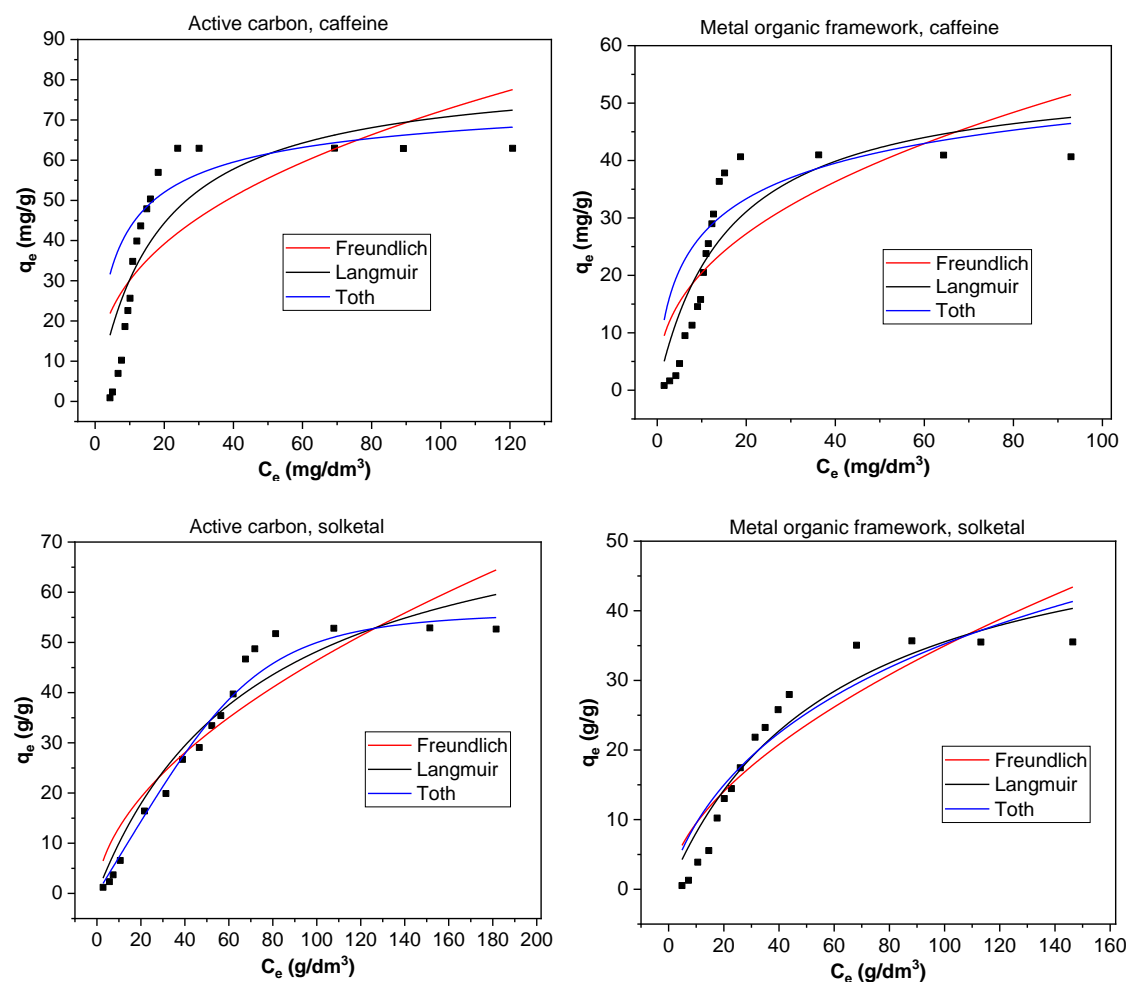

**Figure S1.** Experimental results (scatter) and isotherm adjustment to Langmuir, Freundlich and Toth models for diclofenac, caffeine and solketal adsorption on the AC (first column) and MOF (second column).
